# Supplementary material for: Tumor-suppressive miR-218-5p inhibits cancer cell proliferation and migration via EGFR in non-small cell lung cancer
Source: PubMed Central journal article supplement (PMC5053710; doi:10.18632/oncotarget.8576), 2016-04-04
Supplement: oncotarget-07-28075-s001.pdf [file oncotarget-07-28075-s001.pdf]

**SUPPLEMENTARY TABLE****Supplementary Table S1: Clinical features of lung cancer patients**

|         | <b>Age</b> | <b>Gender</b> | <b>Tumor subtype</b>    | <b>Pathological Stage</b> |
|---------|------------|---------------|-------------------------|---------------------------|
| Case #1 | 57         | Male          | Squamous cell carcinoma | IB                        |
| Case #2 | 56         | Male          | Adenocarcinoma          |                           |
| Case #3 | 64         | Male          | Squamous cell carcinoma | IB                        |
| Case #4 | 59         | Male          | Squamous cell carcinoma |                           |
| Case #5 | 64         | Female        | Adenocarcinoma          | IA                        |
| Case #6 | 60         | Male          | Squamous cell carcinoma | IIB                       |
